# Supplementary material
Source: PubMed Central journal article supplement (PMC4548812)
Supplement: NIHMS710216-supplement.pdf [file NIHMS710216-supplement.pdf]

**Figure S1**

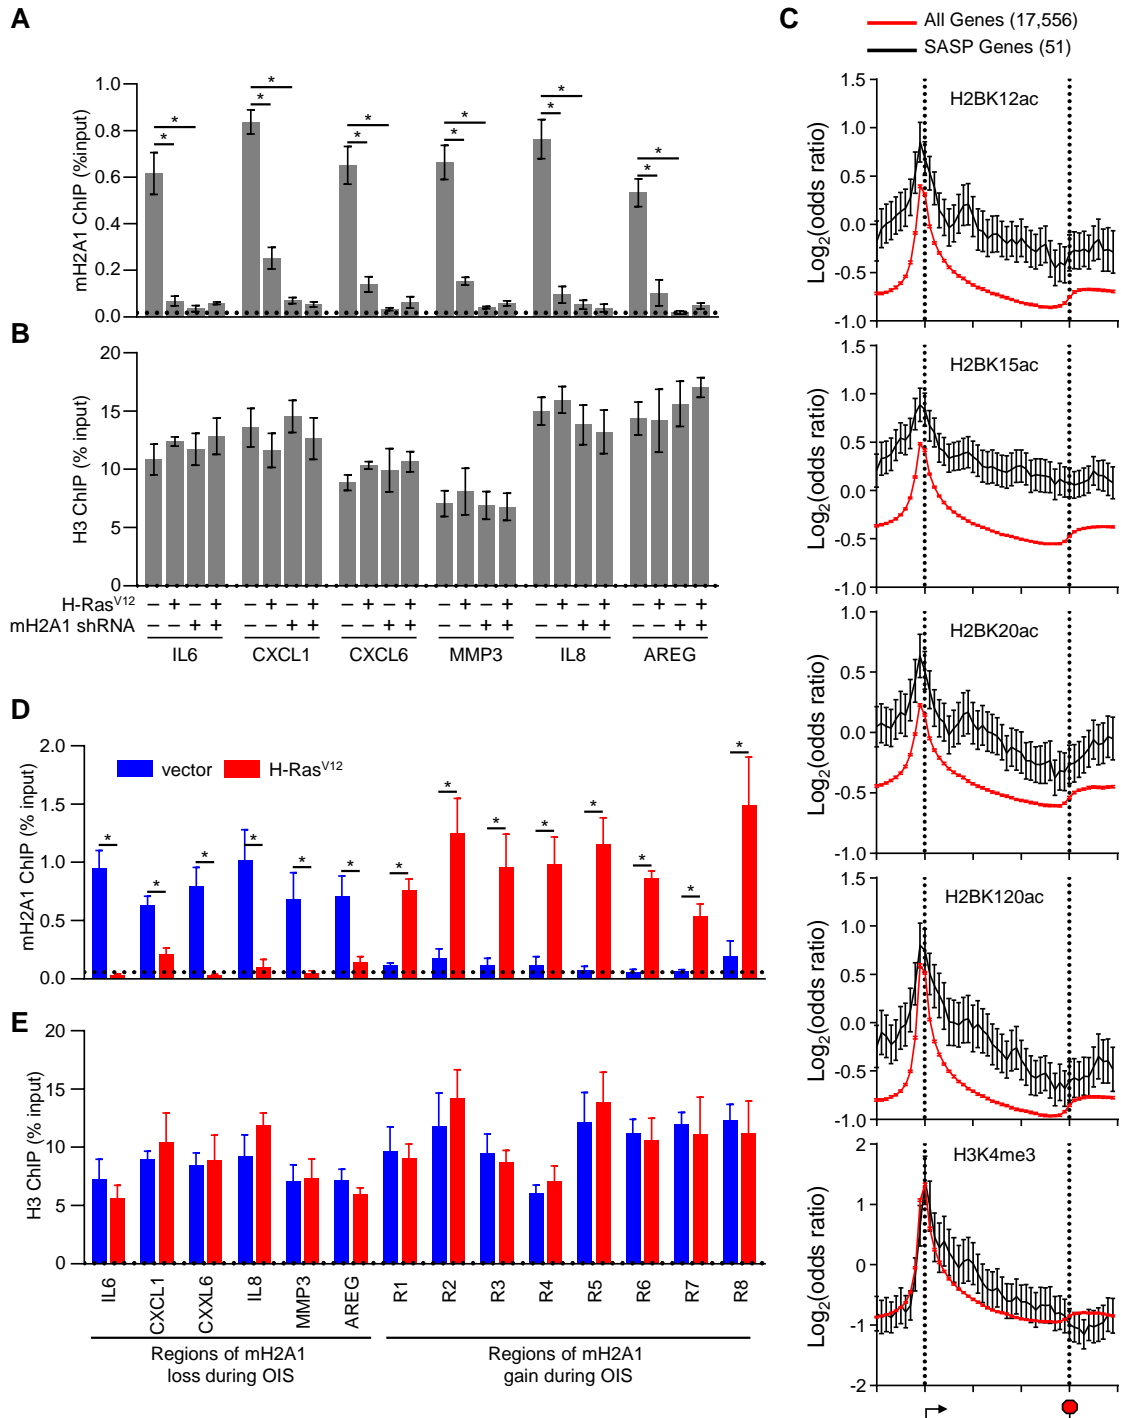

### Figure S1, Related to Figure 1

MacroH2A1 ChIP-seq data is specific and reproducible.

**(A, B)** ChIP-qPCR for macroH2A1 (A) and H3 (B) from IMR90 cells expressing an shRNA against macroH2A1 (+) or luciferase (-), as a control, subjected to retroviral-mediated expression of H-Ras<sup>V12</sup> (+) or empty vector (-) as a control. The horizontal dotted line indicates upper limit of the 95% confidence interval of the signal from no-antibody control ChIPs. Error bars, s.e.m. (n = 3 independent cell passages and retroviral infections). \**p* < 0.05 from two-tailed Student's t-tests.

**(C)** Metagene analysis of ChIP-seq data for various histone PTMs in IMR90 cells. Average enrichment for the indicated histone PTMs on either all autosomal protein coding genes (red) or fifty-one SASP genes (black) defined from gene expression microarray data (GSE40349). The data represent the average signal in ten 1-kb windows upstream of the TSS, 30 windows spanning the gene body and ten 1-kb windows downstream of the end of the gene. The location of the TSS and the end of the gene were depicted by the left and right vertical dotted line respectively. Error bars, s.e.m. (n = 17,556 and 51 for red and black curves respectively).

**(D, E)** Confirmation analysis ChIP-seq identified regions of macroH2A1 gain and loss during OIS. ChIP-qPCR for macroH2A1 (D) and H3 (E) from IMR90 cells. Cells were transduced by vector only (vector) as control or H-Ras<sup>V12</sup> and ChIPs were performed 14 days following retroviral infection. ChIP-seq identified regions that undergo macroH2A1 loss and gain during OIS are indicated. The horizontal dotted line indicates upper limit of the 95% confidence interval of the signal from no-antibody control ChIPs. Error bars s.e.m. (n = 3 independent cell passages and retroviral infections). \* *p* < 0.05 from a two-tailed Student's t-test.

**Figure S2**

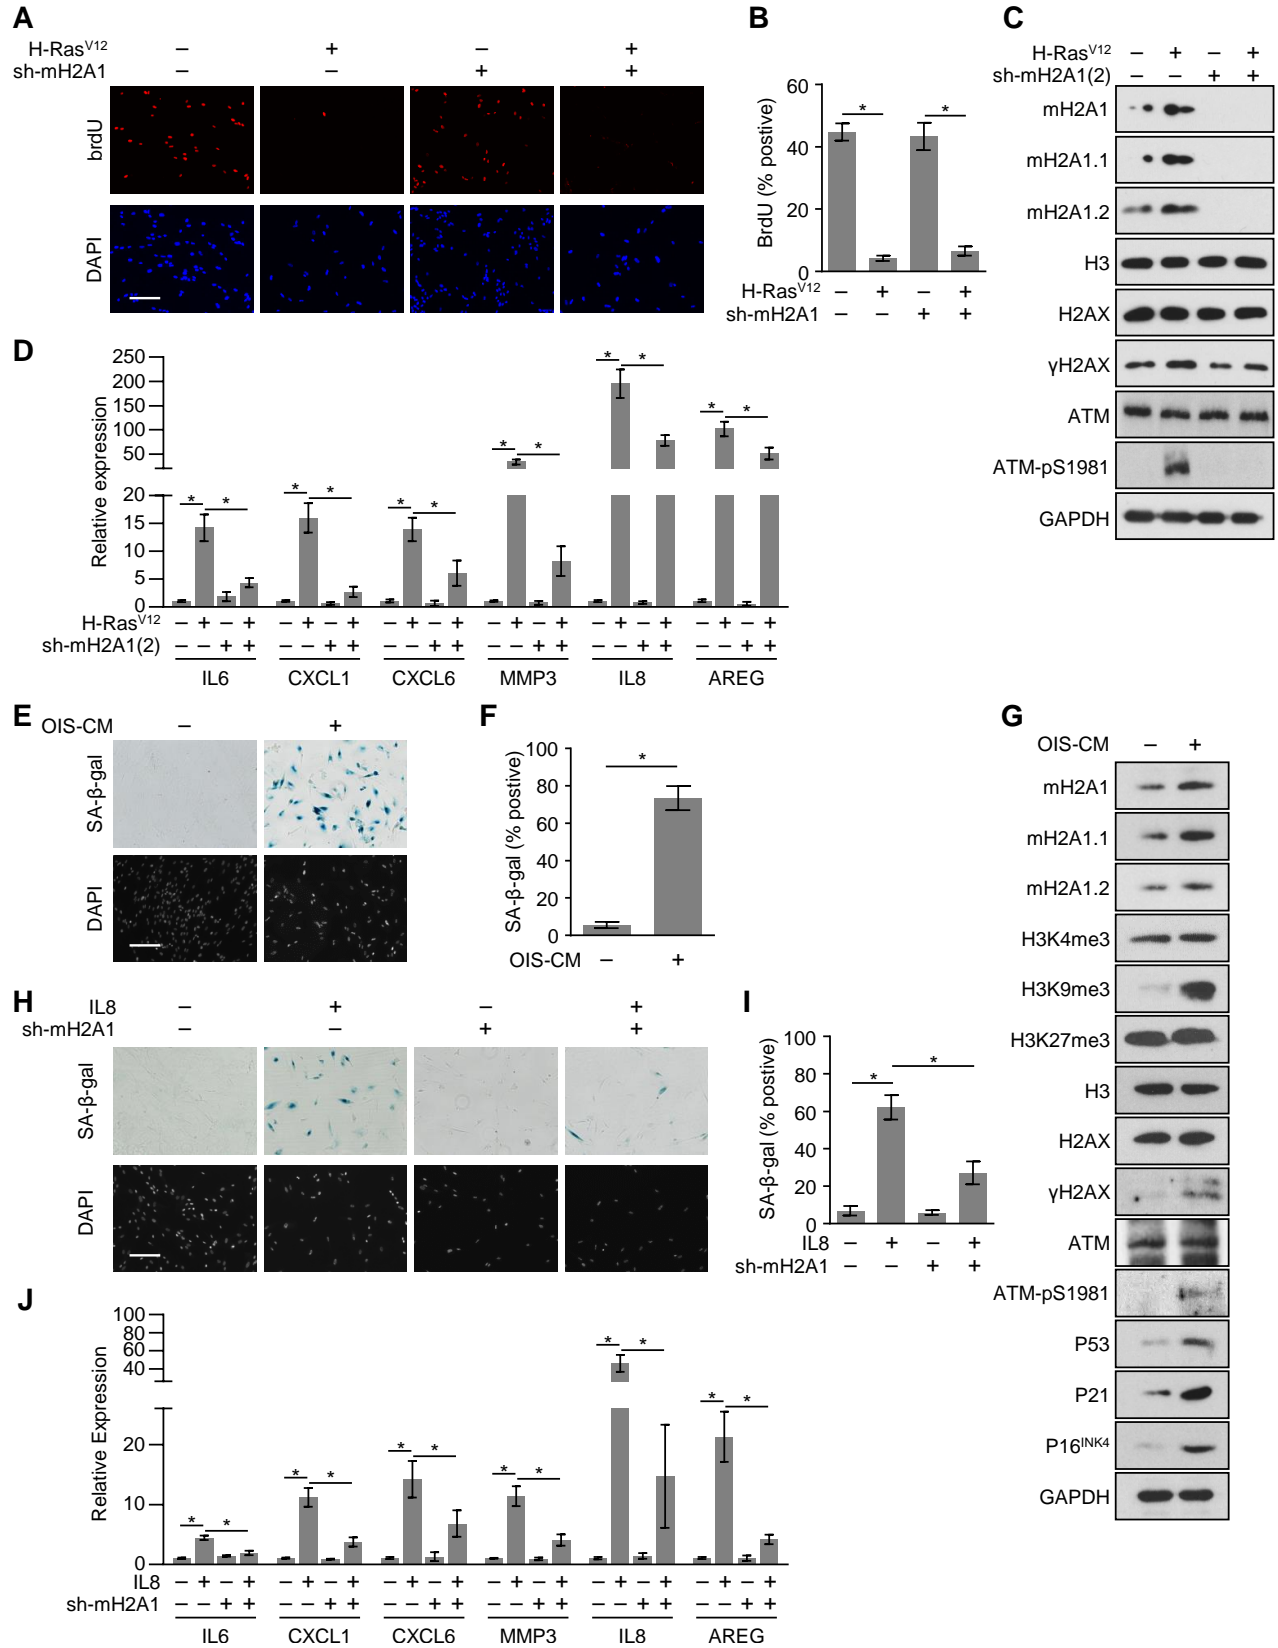

## Figure S2, Related to Figure 2

MacroH2A1 is essential for OIS and OIS-CM can trigger paracrine senescence in IMR90 cells.

(A) Representative immunofluorescence images for brdU (red) counterstained with DAPI (blue) in brdU-treated IMR90 cells expressing shRNA against luciferase (-) as a control or macroH2A1 (+) subjected to retroviral-mediated expression of H-Ras<sup>V12</sup> (+) for OIS or vector only (-) as a control for 14 days. Scale bar, 200  $\mu$ m.

(B) Histogram depicting the percentage of brdU positive-staining for cells treated as described in (A). Error bars s.e.m. (n = 3 independent cell passages and retroviral infections). \*  $p < 0.05$  from a two-tailed Student's t-test.

(C) Immunoblots for macroH2A1 and DDR factors from IMR90 cells as similar to that described in (A) except that macroH2A1 was depleted by an independent shRNA (sh-mH2A1(2)).

(D) RT-qPCR of IMR90 cells described in (C) for the indicated SASP genes. Error bars, s.e.m. (n = 3 independent cell passages and retroviral infections). \*  $p < 0.05$  from two-tailed Student's t-tests.

(E) Representative SA- $\beta$ -gal and DAPI counterstaining of IMR90 cells subjected to paracrine senescence with cultured media from H-Ras<sup>V12</sup>-mediated senescent IMR90 cells (OIS-CM, +) or cultured media from IMR90 cells expressing empty vector (-) as a control for 14 days. Scale bar, 200  $\mu$ m.

(F) Histogram depicting the percentage of SA- $\beta$ -gal positive-staining for cells described in (E). Error bars, s.e.m. (n = 3 independent cell passages and retroviral infections). \*  $p < 0.05$  from two-tailed Student's t-tests.

(G) Immunoblots for macroH2A1 (mH2A1), DDR factors and cell cycle inhibitors from IMR90 cells described as (E).

(H) Representative SA- $\beta$ -gal and DAPI counterstaining of IMR90 cells expressing an shRNA against luciferase (-) or macroH2A1 (+, sh-mH2A1) subjected to 10nM IL8 (+) treatment or BSA (-) control for 14 days. Scale bar, 200  $\mu$ m.

(I) Histogram depicting the percentage of SA- $\beta$ -gal positive-staining cells described in (H). Error bars, s.e.m. (n = 3 independent cell passages and retroviral infections). \*  $p < 0.05$  from two-tailed Student's t-tests.

(J) RT-qPCR for the indicated SASP genes from IMR90 cells treated as described in (H). Error bars, s.e.m. (n = 3 independent cell passages and retroviral infections). \*  $p < 0.05$  from two-tailed Student's t-tests.

**Figure S3**

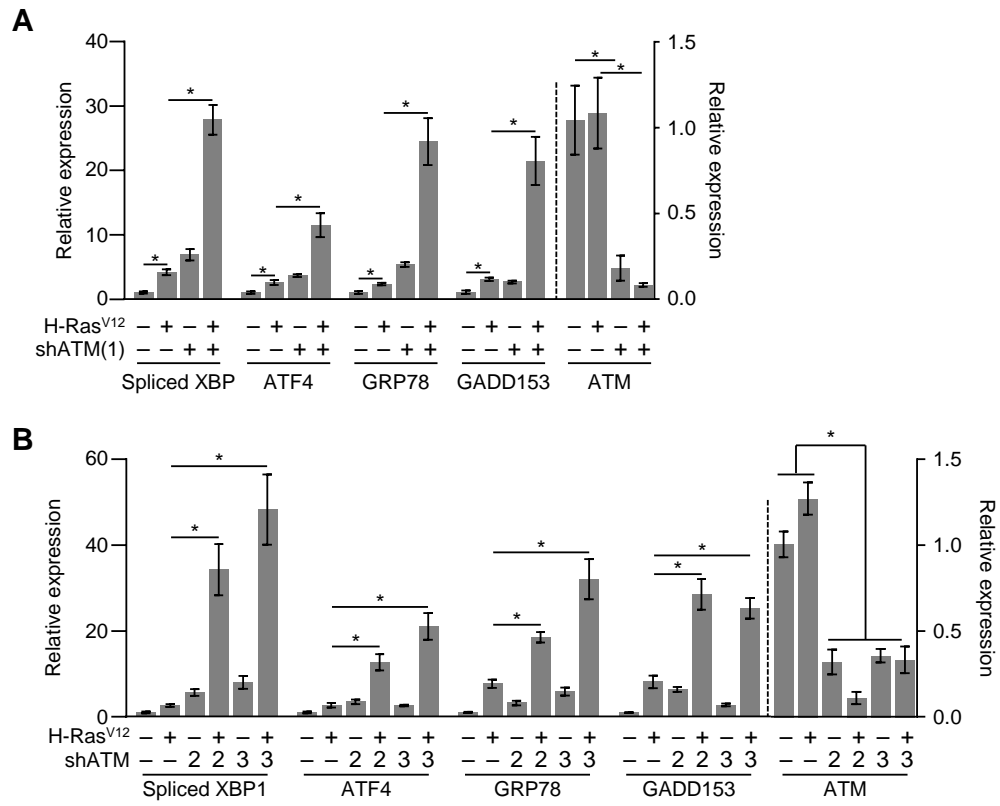

### Figure S3, Related to Figure 4

ATM suppresses senescence-associated ER stress.

(A) RT-qPCR for the indicated UPR genes from IMR90 cells stably expressing an shRNA against ATM (shATM(1), +) or luciferase (-) as a control subjected to retroviral-mediated expression of HRasV12 (+) for OIS or empty vector (-) as a control. The dotted line separates the genes plotted on the left and right axes, respectively. Error bars, s.e.m. (n = 3 independent cell passages and retroviral infections). \* $p < 0.05$  from two-tailed Student's t-tests.

(B) RT-qPCR for the indicated UPR genes from IMR90 cells. The indicated cells were subjected to retroviral-mediated expression of H-Ras<sup>V12</sup> (+) for OIS or empty vector (-) as a control for 3 days. Then, shRNA against luciferase as a control or either of two independent shRNAs against ATM (shATM(2) or shATM(3)) was infected by lentiviral-mediated expression. ATM depletion was also confirmed by RT-qPCR. The dotted line separates the genes plotted on the left and right axes, respectively. Error bars, s.e.m. (n = 3 independent cell passages and retroviral infections). \* $p < 0.05$  from two-tailed Student's t-tests.

**Figure S4**

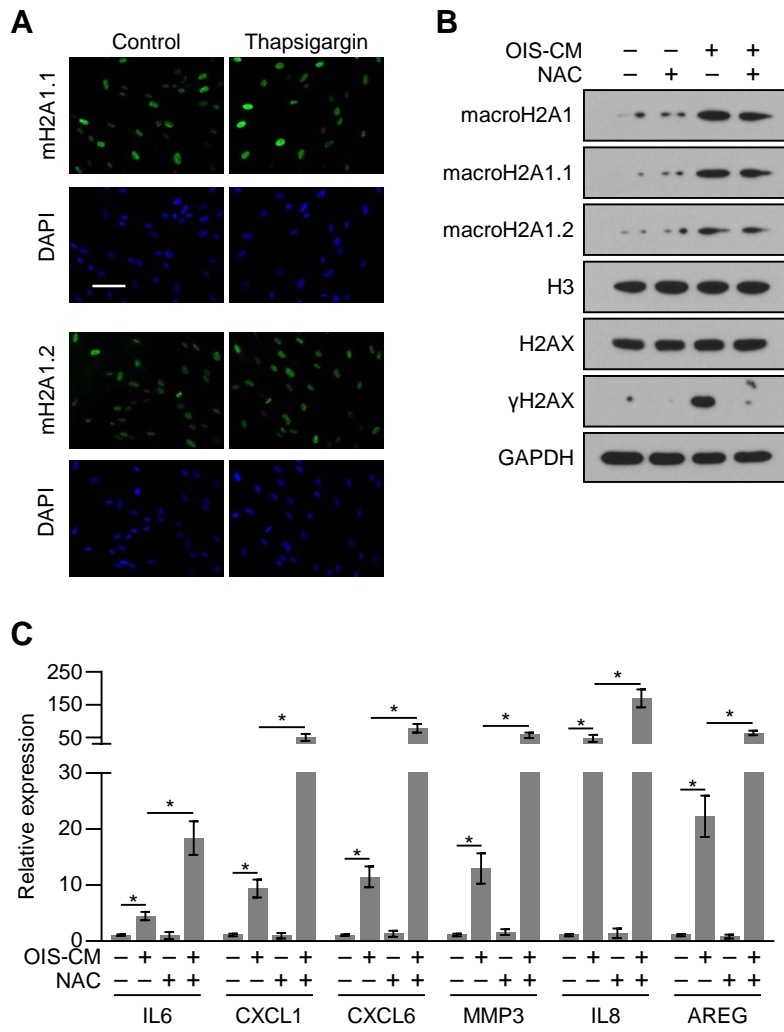

**Figure S4, Related to Figure 5**

ER stress represses SASP gene expression in a ROS dependent manner.

(A) Representative immunofluorescence images for macroH2A1.1 or macroH2A1.2 (green) and counterstained with DAPI (blue) from IMR90 cells treated with 0.25  $\mu$ M of the ER stress inducing agent, thapsigargin, for 3 days. Scale bar, 100  $\mu$ m.

(B) Immunoblots for indicated macroH2A1 subtypes and DDR factors from IMR90 cells subjected to paracrine senescence with cultured media from H-Ras<sup>V12</sup>-mediated senescent IMR90 cells (OIS-CM, +) or cultured media from IMR90 cells expressing empty vector (-) as a control for 3 days. Where indicated, cells were additionally treated with 10 mM NAC (+) or water only (-) as a control.

(C) RT-qPCR for the indicated SASP genes from IMR90 cells treated as described in (B). Error bars,  $\pm$  s.e.m. (n = 3 independent cell passages and retroviral infections). \* $p$  < 0.05 from two-tailed Student's t-tests.



**Figure S5**

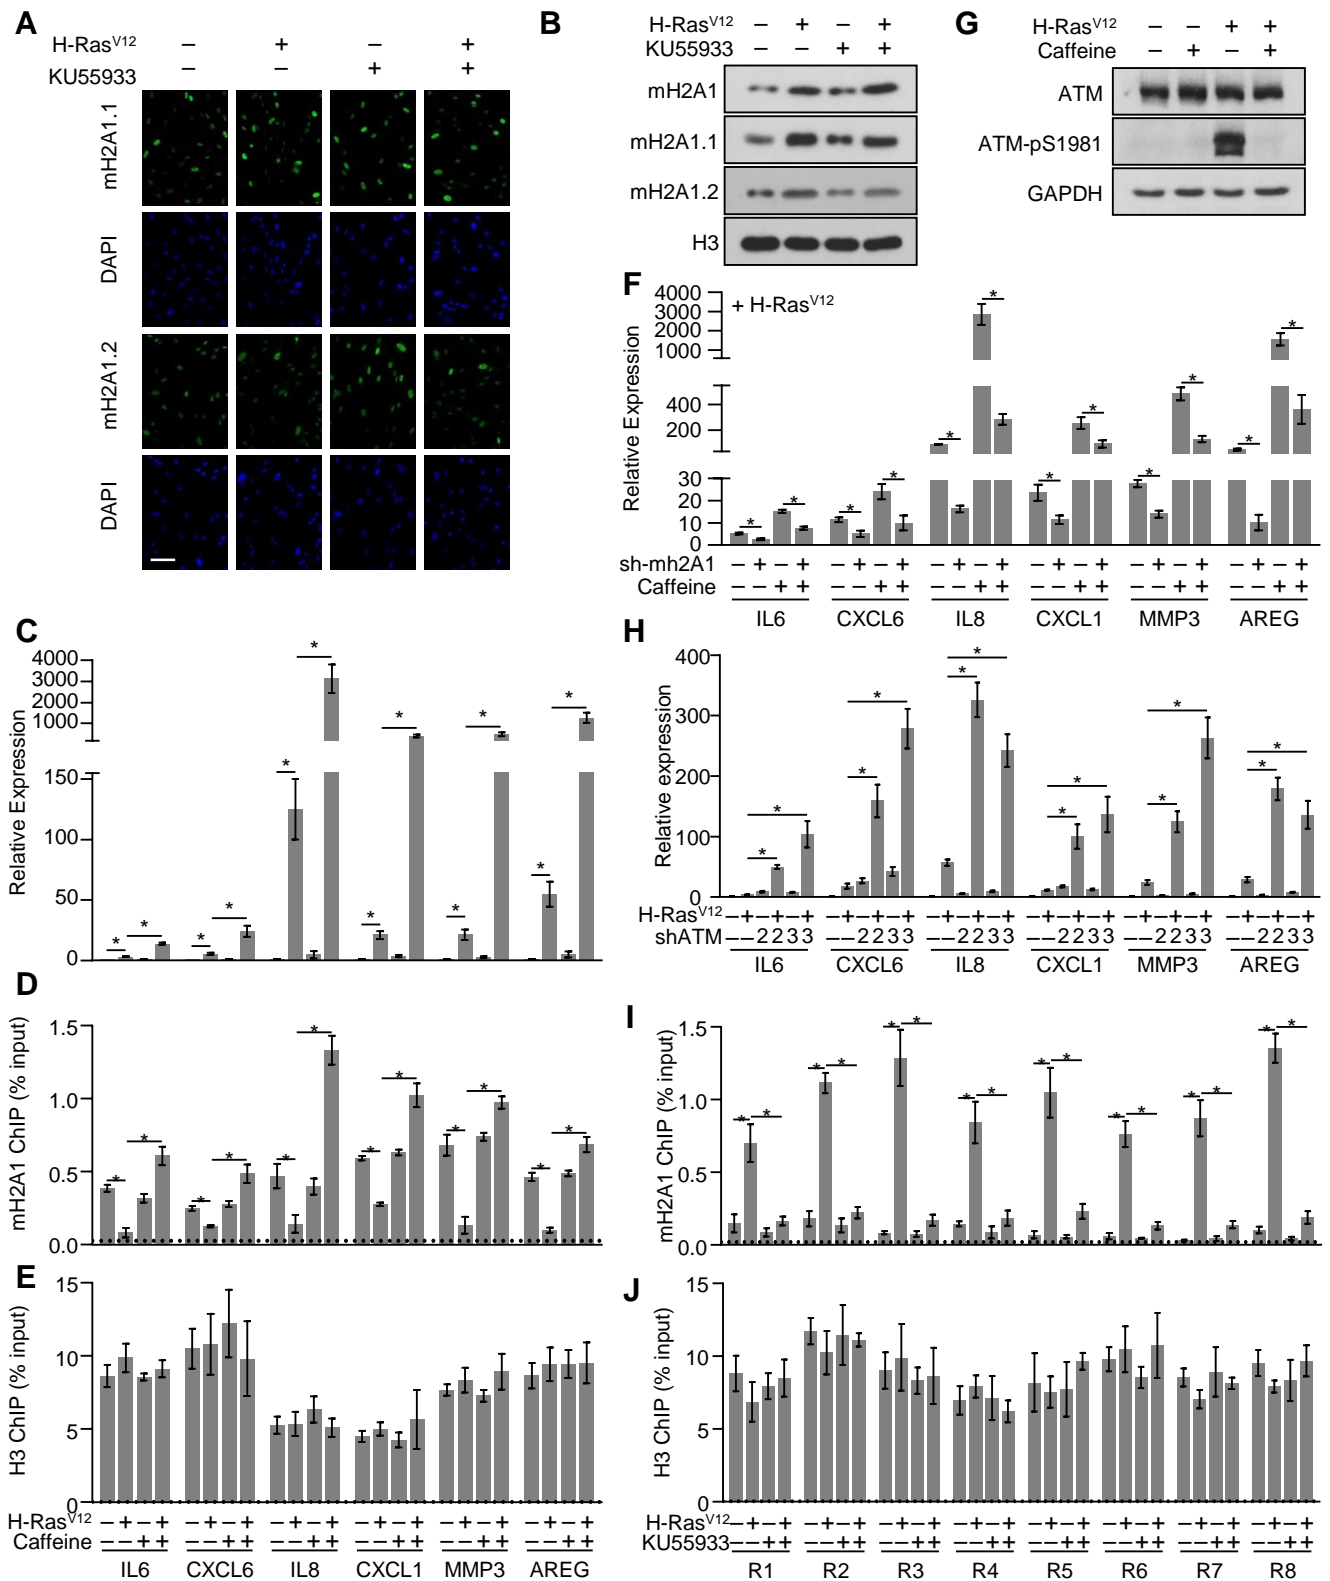

### Figure S5, Related to Figure 6

ATM represses SASP expression by inducing the mobilization of macroH2A1 away from SASP genes.

(A) Representative immunofluorescence images for macroH2A1.1 or macroH2A1.2 (green) and counterstained with DAPI (blue) from IMR90 cells subjected to retroviral-mediated expression of H-Ras<sup>V12</sup> (+) for OIS or empty vector (-) as a control for 3 days. Where indicated cells were treated with 10  $\mu$ M of the ATM inhibitor KU55933 (+) or DMSO (-) as a control. Scale bar, 100  $\mu$ m.

(B) Immunoblots for indicated macroH2A subtypes from IMR90 cells described as (A).

(C) RT-qPCR for the indicated SASP genes from IMR90 cells treated similarly to that described in (A) except 100  $\mu$ M caffeine was used instead of KU55933. Error bars, s.e.m. (n = 3 independent cell passages and retroviral infections). \* $p < 0.05$  from two-tailed Student's t-tests.

(D,E) ChIP-qPCR for macroH2A1 (D) and H3 (E) from IMR90 cells treated as described in (C). Error bars, s.e.m. (n = 3 independent cell passages and retroviral infections). \* $p < 0.05$  from two-tailed Student's t-tests.

(F) RT-qPCR for the indicated genes from IMR90 expressing an shRNA against macroH2A1 (+, sh-mH2A1) or luciferase (-) as a control subjected to retroviral-mediated expression of H-Ras<sup>V12</sup> for 3 days. Error bars,  $\pm$  s.e.m. (n = 3 independent cell passages and retroviral infections). \* $p < 0.05$  from two-tailed Student's t-tests.

(G) Immunoblots for ATM and ATM-pS1981 from IMR90 cells treated as described in (C).

(H) RT-qPCR for the indicated SASP genes from IMR90 cells. The indicated cells were subjected to retroviral-mediated expression of H-Ras<sup>V12</sup> (+) for OIS or empty vector (-) as a control for 3 days. Then, shRNA against luciferase as a control or either of two independent shRNAs against ATM (shATM(2) or shATM(3)) was infected by lentiviral-mediated expression 5 days prior to harvesting the cells. ATM depletion was also confirmed by RT-qPCR. Error bars, s.e.m. (n = 3 independent cell passages and retroviral infections). \* $p < 0.05$  from two-tailed Student's t-tests.

(I, J) ChIP-qPCR of loci that gain macroH2A1 occupancy upon OIS for macroH2A1 (I) and H3 (J) from IMR90 cells treated as described in (A). The horizontal dotted line indicates upper limit of the 95% confidence interval of the signal from no-antibody control ChIPs. Error bars, s.e.m. (n = 3 independent cell passages and retroviral infections). \* $p < 0.05$  from two-tailed Student's t-tests.

**Supplementary Table 1.** Antibodies used in this study.

| Factor or PTM                                                  | Vendor         | Cat Number | Dilution For blotting | Dilution For IF | Vol.for ChIP (μl) |
|----------------------------------------------------------------|----------------|------------|-----------------------|-----------------|-------------------|
| macroH2A1                                                      | Millipore      | 07-219     | 1:1,000               |                 | 8                 |
| macroH2A1.1                                                    | Cell signaling | 4160S      | 1:1,000               | 1:200           |                   |
| macroH2A1.2                                                    | Cell signaling | 4827S      | 1:1,000               | 1:100           |                   |
| H2B Ac K12                                                     | Abcam          | ab40883    | 1:1,000               |                 |                   |
| H3K4me3                                                        | Millipore      | 04-745     | 1:1,000               |                 |                   |
| H3K9me3                                                        | abcam          | ab8898     | 1:1,000               |                 |                   |
| H3K27me3                                                       | Millipore      | 07-449     | 1:3,000               |                 |                   |
| H2AX                                                           | abcam          | ab124781   | 1:1,000               |                 |                   |
| γH2AX                                                          | Millipore      | 05-636     | 1:1,000               |                 |                   |
| H3                                                             | Abcam          | ab1791     | 1:3,000               |                 | 4                 |
| ATM                                                            | GeneTex        | GTX70103   | 1:1,000               |                 |                   |
| ATM-pS1981                                                     | Millipore      | 05-740     | 1:1,000               |                 |                   |
| P53                                                            | SANTA CRUZ     | sc-126     | 1:1,000               |                 |                   |
| P21                                                            | SANTA CRUZ     | sc-397     | 1:1,000               |                 |                   |
| P16 <sup>INK4</sup>                                            | BD Pharmingen  | 554079     | 1:1,000               |                 |                   |
| Anti-Flag M2                                                   | Sigma          | F3165      | 1:5,000               |                 |                   |
| Anti- BrdU                                                     | BD             | 555627     |                       | 1:250           |                   |
| Anti-8-oxo-dG                                                  | abcam          | ab62623    |                       | 1:100           |                   |
| GAPDH                                                          | Cell signaling | 2118L      | 1:1,000               |                 |                   |
| HRP-conjugated goat anti-rabbit secondary antibody             | Jackson Labs   | 111035003  | 1:30,000              |                 |                   |
| HRP-conjugated goat anti-mouse secondary antibody              | Jackson Labs   | 115036003  | 1:30,000              |                 |                   |
| Mouse Anti Rabbit IgG, Light Chain Specific Secondary antibody | Jackson Labs   | 112692     | 1:30,000              |                 |                   |

**Table S2.** ChIP primers used in this study.

| Primer set name | Location in the genome    | Forward sequence     | Reverse sequence        |
|-----------------|---------------------------|----------------------|-------------------------|
| IL6 -P          | chr7:22767668+22767893    | GATTCCTCAAAGCCATTCCA | TGGAGTCCAGAGGTGGTAGG    |
| IL8 -2kb        | chr4:74604071+74604193    | AGGCAACCGTTAGGGAAAAG | GGACACAACCTGGCTTGACT    |
| CXCL1 -1.6kb    | chr4:74733260+74733377    | TGGAAACTGAGCTTTTGGTG | TGCTACCCAACCTACCCCTAATG |
| CXCL6 -3kb      | chr4:74699511+74699633    | GCAATTTGCTGGGTGATTTT | AATTGGCCCCAAAGTGAAAT    |
| MMP3 -1.8kb     | chr11:102715943+102716042 | GGGGGAAAAACCATGTCTTG | ATTCACATCACTGCCACCAC    |
| AREG +1kb       | chr4:75481819+75481968    | GGACAGCTGAATTTGCTTGC | AAGTAGGGTGCCTTTCGAGTC   |
| R1              | chr7:25256321+25256519    | TGTGCTGATTCCTCACTGCT | AACACCACCAGCACAACAAA    |
| R2              | chr4:75717898+75718092    | GCATCGCCAACCCTTTACTA | GCAGGGTAACCTGTGGAAAA    |

|    |                          |                      |                      |
|----|--------------------------|----------------------|----------------------|
| R3 | chr4:78182313+78182401   | ACGGACAGCTGCAGATTCTT | CTCAGCTTACCCAGCCTGAC |
| R4 | chr4:152762165+152762260 | CCAATAAATCCAGCCCAGAA | GGGTGCTTTTGATGGTTTGT |
| R5 | chr4:75717898+75718092   | GCATCGCCAACCCTTTACTA | GCAGGGTAACCTGTGGAAAA |
| R6 | chr4:52992369+52992650   | AAGGAAAAATGAAGCCCAAA | CTCAAAGTTGCCCAGGAATC |
| R7 | chr11:82442652+82442723  | TACAGTTTGCCACCCTCTC  | TGGGTTCCATTTCTCTCCTG |
| R8 | chr11:79197477+79197721  | ACTGGGAGGGGCTTAGTCAT | CATCCACTGTGCCTCAGAGA |

**Table S3.** RT-PCR primers used in this study.

| Gene name    | Forward sequence             | Reverse sequence         |
|--------------|------------------------------|--------------------------|
| ACTB         | AGCTACGAGCTGCCTGAC           | AAGGTAGTTTCGTGGATGC      |
| IL6          | TTCTGCGCAGCTTTAAGGAG         | AGGTGCCCATGCTACATTTG     |
| IL8          | ATGACTTCCAAGCTGGCCGTG        | TGTGTTGGCGCAGTGTGGTC     |
| CXCL1        | CACCCCAAGAACATCCAAAG         | TAACTATGGGGGATGCAGGA     |
| CXCL6        | TGTTTACGCGTTACGCTGAG         | AACTTGCTTCCCGTTCTTCA     |
| MMP3         | AGGGAACCTTGAGCGTGAATC        | TCACTTGTCTGTTGCACACG     |
| AREG         | AGCTGCCTTTATGTCTGCTG         | TTTCGTTCCCTCAGCTTCTCC    |
| Spliced XBP1 | TGCTGAGTCCGCAGCAGG           | GTCCAGAATGCCCAACAGGA     |
| ATF4         | CCAGGTGTTCTCTGTGGGTC         | TGGCTGCTGTCTTGTTTTGC     |
| GRP78        | TCACATGTCTTTGGGTGGGG         | CCAGATGCACATGACCCAGT     |
| GADD153      | GCCTTTCTCCTTTGGGACACTGTCCAGC | CTCGGCGAGTCGCCTCTACTTCCC |
| ATM          | CGAAAAGAATCTGGGGTTTG         | ACAAAGTAGGGTGGGAAAGC     |

## SUPPLEMENTAL EXPERIMENTAL PROCEDURES

### Cell culture

IMR90 primary human fetal lung fibroblast cells (ATCC), hTERT-immortalized IMR90 (IMR90-hTERT) cells (Novikov et al., 2011) and IMR90-hTERT cells depleted of macroH2A1 with either of two independent shRNAs or luciferase (as a control) (Novikov et al., 2011) were cultured in MEM supplemented with 10% FBS. Transformed human embryonic kidney HEK293T cells (ATCC) were cultured in DMEM supplemented with 10% FBS. Cell lines in culture were routinely tested for mycoplasma contamination. Retroviral packaging and infections were performed as previously described (Novikov et al., 2011).

Senescence of IMR90 and IMR90-hTERT cells was induced using three independent methods, OIS, paracrine senescence, and macroH2A1.1 ectopic expression. OIS was induced

by retroviral-mediated ectopic expression of H-Ras<sup>V12</sup> or empty vector (as a control). The retroviral expression constructs, pBABE-puro and pBABE-puro-H-Ras<sup>V12</sup>, were gifts from William Hahn (Addgene plasmid #9051). Paracrine senescence was induced either by using conditioned media from H-Ras<sup>V12</sup> expressing senescent IMR90-hTERT cells (or normally growing IMR90-hTERT cells as a control) or by treating IMR90-hTERT cells with or without 10 nM recombinant human IL8 (R&D systems, 618-IL-101) reconstituted at 100 µg/ml in PBS containing 0.1% bovine serum albumin. For paracrine senescence by conditioned media, media was collected from H-Ras<sup>V12</sup>-induced senescent cells or normally growing cells as a control. Fourteen days post-infection, the cultured medium in the dish was collected every 3 days, centrifuged at 3,000 rpm × 10min, then the supernatant was filtered through a 0.2 µm pore filter (GE Helthcare). The resulting filtered medium was then mixed with an equal volume of MEM 20% FBS and used as media for normal IMR90-hTERT cells. Senescence was also monitored in IMR90-hTERT cells after retroviral-mediated ectopic expression of either green fluorescent protein (GFP), macroH2A1.1, macroH2A1.1 point mutants G224E, G314E, macroH2A1.2 as described previously (Chen et al., 2014).

Both stable and transient depletion of ATM was performed with lentivirus-mediated expression of shRNA obtained from the TRC genome-wide shRNA collection. For stable depletion of ATM, IMR90 cells were subjected to lentiviral-mediated expression of either an shRNA against luciferase (shLuc, sequence: 5'-CCTAAGGTTAAGTCGCCCTCG-3') or an shRNA against ATM (shATM(1), target sequence: 5'-CCTGCCAACATACTTTAAGTA-3', TRCN0000038654). Three days post-infection, the cells were selected with 1 µg/ml puromycin for three days. In the case of transient depletion of ATM, IMR90 cells subjected to retroviral-mediated expression of H-Ras<sup>V12</sup> or empty vector as a control for three days were infected with either shLuc, shATM(2) (target sequence: 5'-CCTTTCATTCAGCCTTTAGAA-3',

TRCN0000039948) or shATM(3) (target sequence: 5'-CCTGCCAACATACTTTAAGTA-3', TRCN0000038654). The cells were then used five days post-infection for RT-qPCR assays.

Where indicated, cells were treated with 100  $\mu$ M Caffeine (Sigma, C0750), 10  $\mu$ M KU55933 (R&D systems, 3544), a selective ATM kinase inhibitor and/or 250 nM thapsigargin (Fisher, 328570010) and 10 mM NAC (Sigma, A7250).

### **SA- $\beta$ -Gal staining**

Cells were plated in cell culture chambers with culture slides affixed on the bottom (BD Falcon) to provide a consistent surface for cell growth at  $5 \times 10^4$  cells/chamber and allowed to attach overnight. Cells in the chamber were washed in PBS once, and then fixed for 20 min at room temperature in fixing solution (2% formaldehyde and 0.2% glutaraldehyde in PBS). The fixed cells were washed with PBS twice and incubated at 37°C for 16 h with freshly prepared SA- $\beta$ -Gal staining solution (1 mg/ml 5-bromo-4-chloro-3-indolyl  $\beta$ -D-galactoside (X-Gal), 40 mM citric acid/sodium phosphate pH 6.0, 5 mM potassium ferrocyanide, 5 mM potassium ferricyanide, 150 mM NaCl and 2 mM  $MgCl_2$ ). Following staining, the cells were washed with PBS three times. The cells were then mounted to coverslips with a DAPI-containing mounting solution (SouthernBiotech, 0100-20) to label nuclei. The cells were imaged with a Zeiss Axio Observer microscope. Stained and unstained cells were quantified over four separate fields containing at least 80 cells.

### **Bromodeoxyuridine (BrdU) incorporation assay**

Cells were plated in coverslips in 6 wells plate format for 24 hours. After addition of 10  $\mu$ M brdU (Sigma Aldrich, B5002) for 2 hr, cells were fixed in cold 70% ethanol for 5 min at room temperature. Then, the cells were treated for 30 min with 1.5 N HCl and blocked for 1 hr with blocking buffer (1x PBS / 5% fetal bovine serum / 0.3% Triton X-100) at room temperature. The cells were then incubated in Brdu primary antibody solution (BD, 555627, 1:250) followed by

incubation in Alexa Fluor® 568-conjugated secondary antibody diluted in 1x PBS with 1% BSA for 1.5 hours at room temperature in the dark. Coverslips were mounted onto slides using DAPI-containing mounting solution (SouthernBiotech, 0100-20). The cells were imaged with a Zeiss Axio Observer microscope. Images were quantified over four separate fields containing at least 100 cells.

### **Immunoblots and acid-extraction of histones**

Immunoblots and acid-extraction of histones were performed as previously described (Chen et al., 2014). Briefly, cells from a 10-cm dish were lysed in 100 ul of 0.1% Triton X-100 lysis buffer. After incubation on ice for 30 min, the lysate was centrifuged at 14,000 r.p.m. for 10 min at 4 °C. The supernatant was collected as the detergent lysate. The pellets containing the histones were resuspended in 80 ul of 0.5 M HCl at 4 °C for 2 hours under constant agitation. The sample was spun at 14,000 r.p.m. for 10 min at 4 °C. The resulting supernatant containing the histones was neutralized with 20 ul of 2 M Tris base. The acid-extracted fraction was used for immunoblots of histones and the detergent lysates were used for immunoblots of all other factors. The detergent lysates and acid extracts were subjected to SDS-PAGE and immunoblotting (Antibodies information are listed in Table S1. HRP-conjugated goat anti-mouse or anti-rabbit secondary antibody (Jackson Labs) was used for detection by ECL chemiluminescence according to the manufacturer's instructions (Thermo, Super Signal West Pico). All immunoblots have been repeated at least twice with independent biological samples.

### **Chromatin Immunoprecipitation (ChIP)**

Chromatin Immunoprecipitation (ChIP) was performed as previously described (Chen et al., 2014). Briefly, cells were grown to 90% confluence in 15-cm dishes, cross-linked with 1% formaldehyde in PBS at room temperature for 10 min and then quenched in 125 mM glycine for 5 min. The cells were washed with cold PBS once and were collected by centrifugation and then

sonicated in lysis buffer (50 mM Tris, pH 7.9, 10 mM EDTA, 1% SDS, protease-inhibitor cocktail and 1 mM DTT) to generate chromatin fragments of ~500 bp in length. The material was clarified by 10 min centrifugation at 14,000 r.p.m. and 4 °C, and 20 µl supernatant was used as input for quantitation. The remaining supernatant was diluted ten-fold in dilution buffer (20 mM Tris, pH 7.9, 2 mM EDTA, 150 mM NaCl, 0.5% Triton X-100, protease-inhibitor cocktail and 1 mM DTT) and precleared with 20 µl protein A–agarose beads at 4 °C for 3 h. The supernatant was used in immunoprecipitations at 4 °C overnight with antibodies against histone H3 (4 µl), macroH2A1 (8 µl), as indicated (catalog numbers, dilution factors and validation information in Table S1) and was then incubated with 40 µl protein A–agarose beads at 4 °C for 2 h. No-antibody (NA) controls were always included. The immunoprecipitated DNA was cleared of protein by digestion with 0.4 mg/ml glycogen and proteinase K (0.45 mg/ml, Roche) in Txn stop buffer at 37 °C for 1 h. The DNA was then extracted with phenol/chloroform/isoamyl alcohol (25:24:1) and ethanol precipitated. Quantitative real-time PCR with SYBR Green (Invitrogen) was used to determine enrichment of immunoprecipitated material relative to input with gene-specific primers to the specified regions (Table S2).

### **ChIP-Seq**

Retrovirus encoding constitutive active H-Ras<sup>V12</sup> was infected into primary IMR90 cells to trigger OIS. In parallel, IMR90 cells were infected by empty vector as a control. Following 14 days selection in 1 µg/ml puromycin, a portion of the cells were stained for SA-β-Gal activity to confirm senescence. The cells were then processed for ChIP-seq as previously described (Chen et al., 2014). All genomic coordinates use human genome version hg19. Mapped reads and ISOR processed data were uploaded to GEO (GSE64601). Our previous macroH2A1 ChIP-seq from normally growing IMR90 cells is available from GEO (GSE54847). ChIP-seq data for the 26 additional histone marks in IMR90 cells were downloaded from the GEO website (GSE16256).



## **Expression microarray analysis**

SASP genes were identified from previously published publically available expression microarray data (GSE40349) (Aksoy et al., 2012). Genes with altered expression between the growing and H-Ras<sup>V12</sup>-mediated senescent IMR90 cells were determined by analysis using the GEO2R web tool (<http://www.ncbi.nlm.nih.gov/geo/info/geo2r.html>) using default parameters. SASP genes were defined as secreted genes (using Gene Ontology accession GO\_0005576) that were upregulated at least 4-fold with a Benjamini and Hochberg corrected p value less than 0.01.

## **RT-qPCR**

RNA purification and RT-qPCR were performed as described previously (Chen et al., 2014). mRNA levels were analyzed by reverse transcription followed by quantitative PCR (RT-qPCR). RNA was isolated with TriPure (Roche) according to the manufacturer's protocol. The RNA was reverse transcribed with Moloney murine leukemia virus (MMLV) reverse transcriptase (Invitrogen) and a dT18 primer. cDNA, SYBR Green PCR master mix, and forward and reverse primers were used in 45 cycles of amplification (95 °C for 15 s, 60 °C for 1 min) following 10 min incubation at 95 °C, with a LightCycler 480 (Roche). The efficiency-corrected threshold cycle ( $\Delta$ CT) method was used to determine the relative levels of RNA. For transcription analysis, the expression was normalized to ACTB. Melting-curve analysis was performed to ensure specificity. Expression primer sequences are listed in Table S3.

## **Dihydroethidium (DHE) staining for ROS detection**

To measure the total superoxide level in living cells, cells were plated in coverslips in 6 wells plates for 24 hours. Then the cells were stained with 10  $\mu$ M DHE (Santa Cruz, sc-204724) in cell culture medium and incubated for 30 min. Cell-permeable dye Hoechst 33342 (Life

Technologies, H-3570) was added for counterstaining the nuclei of the IMR90 cells. Images were acquired on a Zeiss Axio Observer microscope. Images were quantified over four separate fields containing at least 100 cells.

### **Immunofluorescence**

Cells ( $5 \times 10^4$ ) were plated on coverslips in 6-well plates. After 24 hours, the cells were fixed with 4% paraformaldehyde for 15 min at room temperature. Washed by PBS twice, the cells were then permeabilized with PBS with 0.1% Triton X-100 for 10 min at room temperature. In the case of 8-oxo-dG, the fixed cells were incubated with 2 M HCl for 20 min at room temperature, followed by, 0.1 M sodium borate, pH 8.5. Cells were blocked for 1 hr at room temperature in 5% fetal bovine serum (in PBS). The cells were then incubated with primary antibodies (anti-macroH2A1.1 (Cell Signaling, 12455S, 1:200), macroH2A1.2 (Cell Signaling, 4827S, 1:100), anti-8-oxo-dG (abcam, ab62623, 1:100) diluted in PBS with 1% calf serum overnight at 4 °C. Following washing, the cells were incubated with either goat anti-rabbit IgG conjugated to Alexa Fluor® 488 (Life Technologies, A-11034, 1:1000) or goat anti-mouse IgG conjugated to Alexa Fluor® 594 conjugate (Life Technologies, A-11005, 1:1000) at room temperature for 1 hr, washed, and mounted onto slides using DAPI-containing mounting solution (SouthernBiotech, 0100-20). Images were acquired on a Zeiss Axio Observer microscope. Images were quantified over four separate fields containing at least 100 cells.

### **Statistical analysis**

All SA- $\beta$ -Gal staining, ROS detection, immunofluorescence, ChIP and RT-qPCR experiments have been repeated at least 3 times. All western blots were performed at least twice using independent biological samples. Results are presented as means  $\pm$  s.e.m. Two-tailed Student's t-tests were used to determine the significance of differences between samples

indicated in figures. For ChIP-Seq results analysis, Fisher exact tests have been applied to determine the significance of enrichment in count data.

### **ACCESSION NUMBERS**

ChIP-seq data have been deposited in the Gene Expression Omnibus database under accession code GSE64601.

### **SUPPLEMENTAL REFERENCES**

Aksoy, O., Chicas, A., Zeng, T., Zhao, Z., McCurrach, M., Wang, X., and Lowe, S.W. (2012). The atypical E2F family member E2F7 couples the p53 and RB pathways during cellular senescence. *Genes Dev.* 26, 1546–1557.

Chen, H., Ruiz, P.D., Novikov, L., Casill, A.D., Park, J.W., and Gamble, M.J. (2014). MacroH2A1.1 and PARP-1 cooperate to regulate transcription by promoting CBP-mediated H2B acetylation. *Nat. Struct. Mol. Biol.* 21, 981–989.

Novikov, L., Park, J.W., Chen, H., Klerman, H., Jalloh, A.S., and Gamble, M.J. (2011). QKI-mediated alternative splicing of the histone variant MacroH2A1 regulates cancer cell proliferation. *Mol. Cell. Biol.* 31, 4244–4255.
